# Supplementary material for: Investigating the Role of Brain Natriuretic Peptide (BNP) and N-Terminal-proBNP in Thrombosis and Acute Ischemic Stroke Etiology
Source: MDPI journal article supplement (doi:10.3390/ijms25052999), 2024-03-05

**Supplementary Figure S1.** IHC staining of positive and negative controls for the white blood cell markers: CD3 (A), CD66b (B), CD68 (C) and negative control (D) in human tonsil are provided.

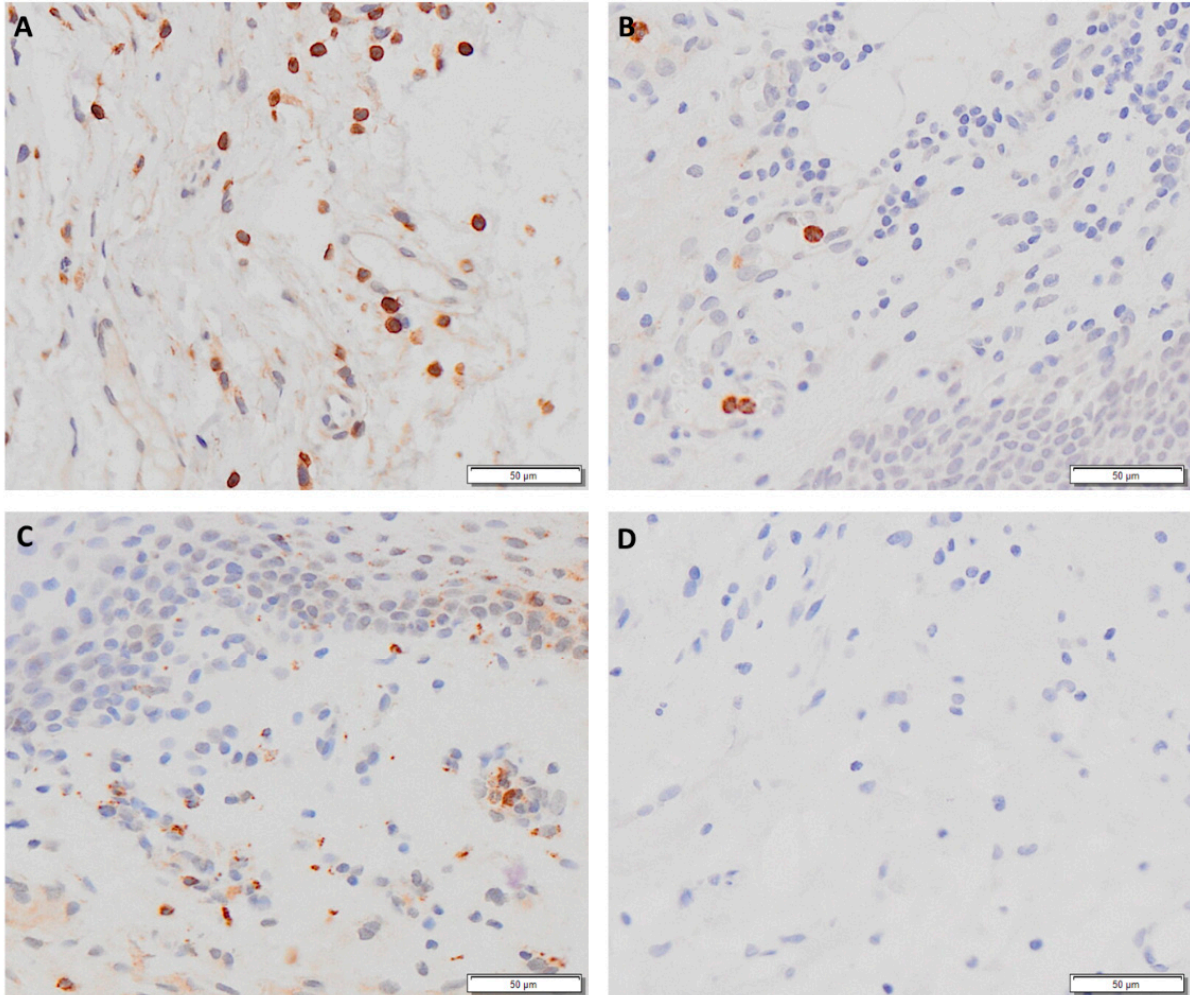

Supplement: s1 [file s1]
